# Supplementary material
Source: publisher figshare collection journal article supplement (https://acs.figshare.com/ndownloader/files/24762724)
Supplement: Supplementary file 1 [file 24762724]

# Synthesis of High Purity SiC Nanowires via Catalyst Free Pyrolysis of SiO<sub>2</sub>/Si and Sponge-like Graphene Oxide

Shaoyun Chen,<sup>a</sup> Wenjie Li,<sup>a</sup> Bo Qu,<sup>a</sup> Xiaoying Liu,<sup>a</sup> Rui Wang,<sup>a</sup> Dongxian Zhuo,<sup>a\*</sup> and Lixin  
Wu<sup>b\*</sup>

<sup>a</sup>College of Chemical Engineering and Materials Science, Quanzhou Normal University,  
Quanzhou 362000, People's Republic of China

<sup>b</sup>Fujian Institute of Research on the Structure of Matter, Chinese Academy of Sciences,  
Fuzhou 350000, People's Republic of China

## Contents

- S1. SEM images of the SiC nanowires synthesized by pyrolysis of SiO<sub>2</sub>/Si and graphene  
oxide with different reaction times.

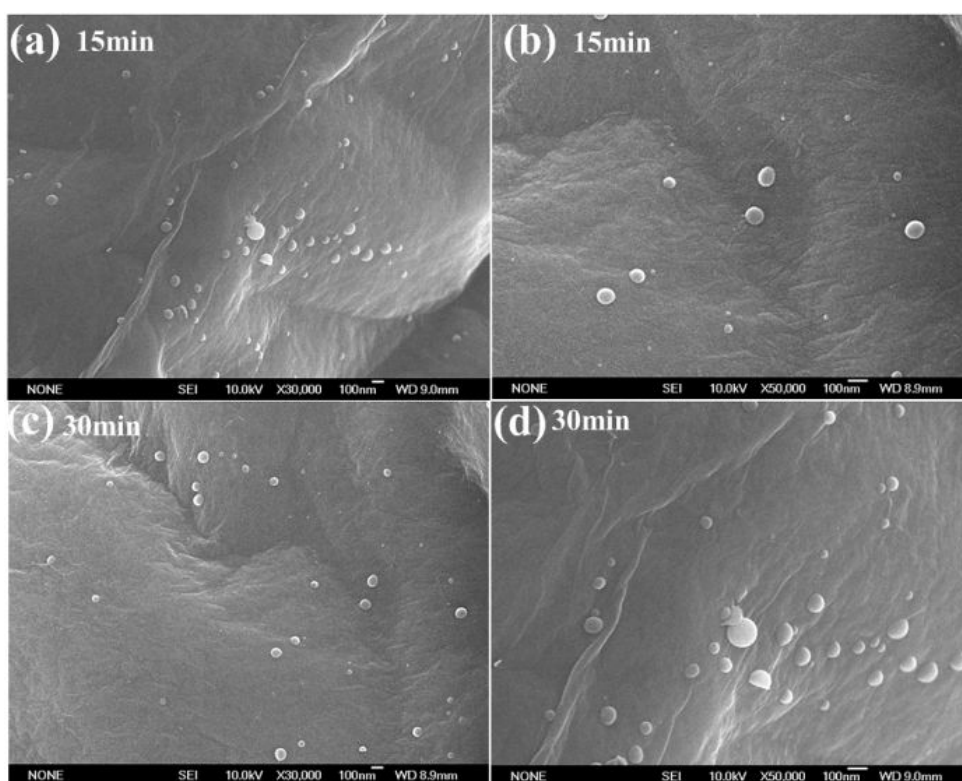

Figure S1. SEM images of the SiC nanowires synthesized by pyrolysis of SiO<sub>2</sub>/Si and graphene oxide with different reaction times ((a)(b): 15min; (c) (d):30min;)

---
